# Supplementary material
Source: ML conference proceedings conference paper supplement (https://openreview.net/forum?id=dlUjNdybnq)

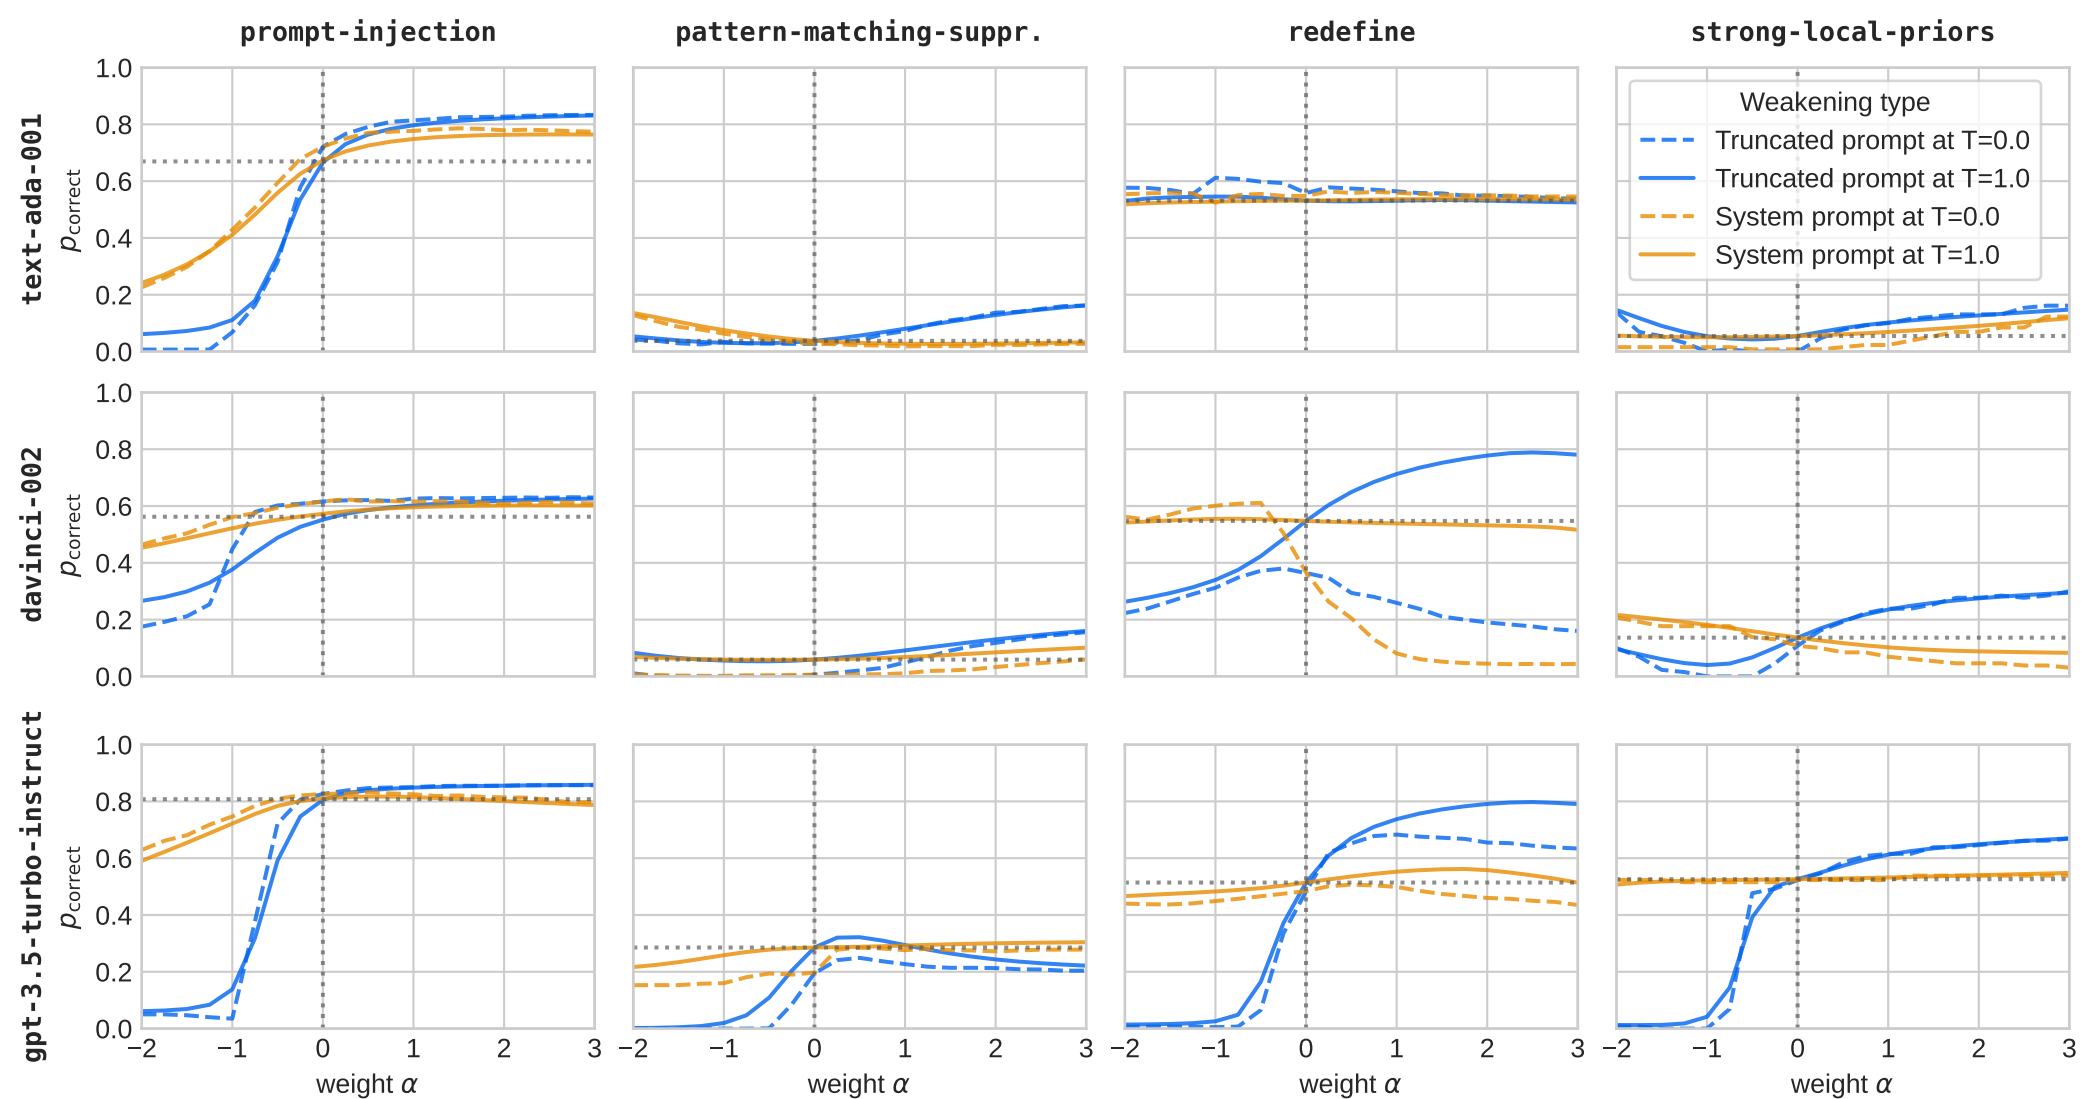

Supplement: supplementary_material [file attachment]

$\alpha = 1.0$ 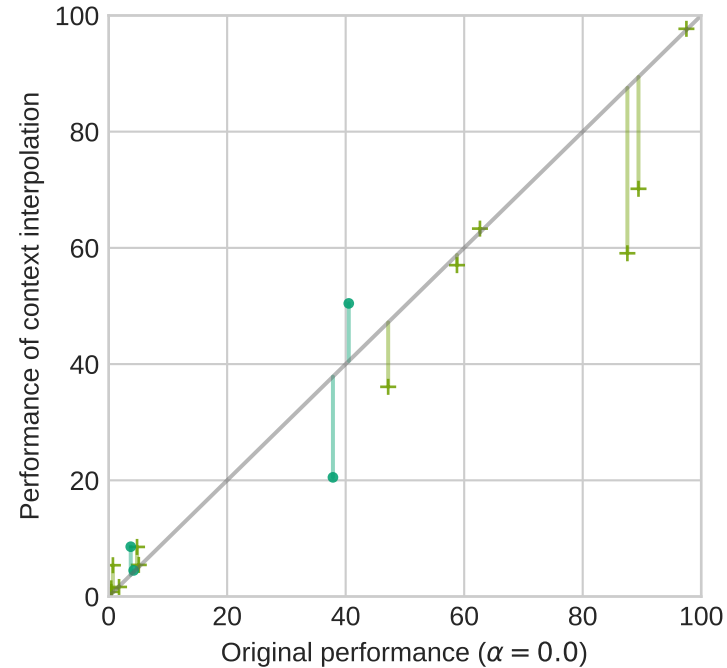 $\alpha = 2.0$ 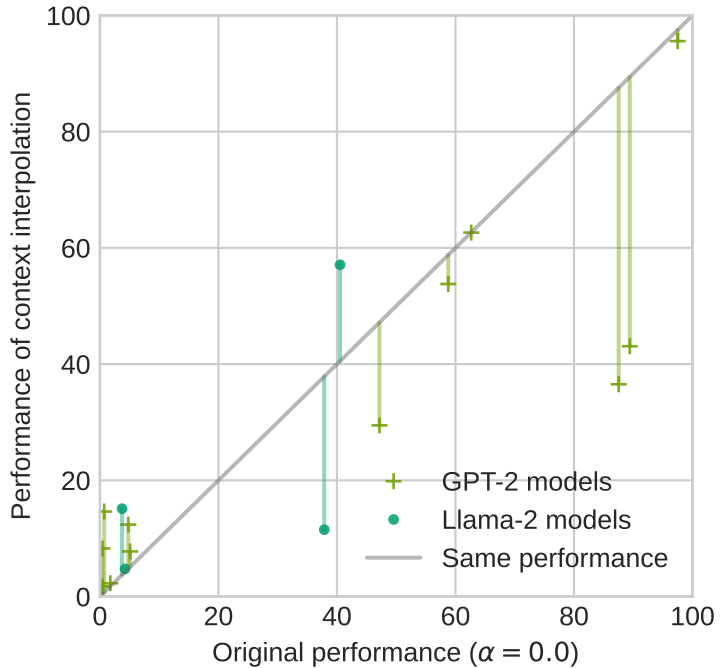

Supplement: supplementary_material [file attachment]

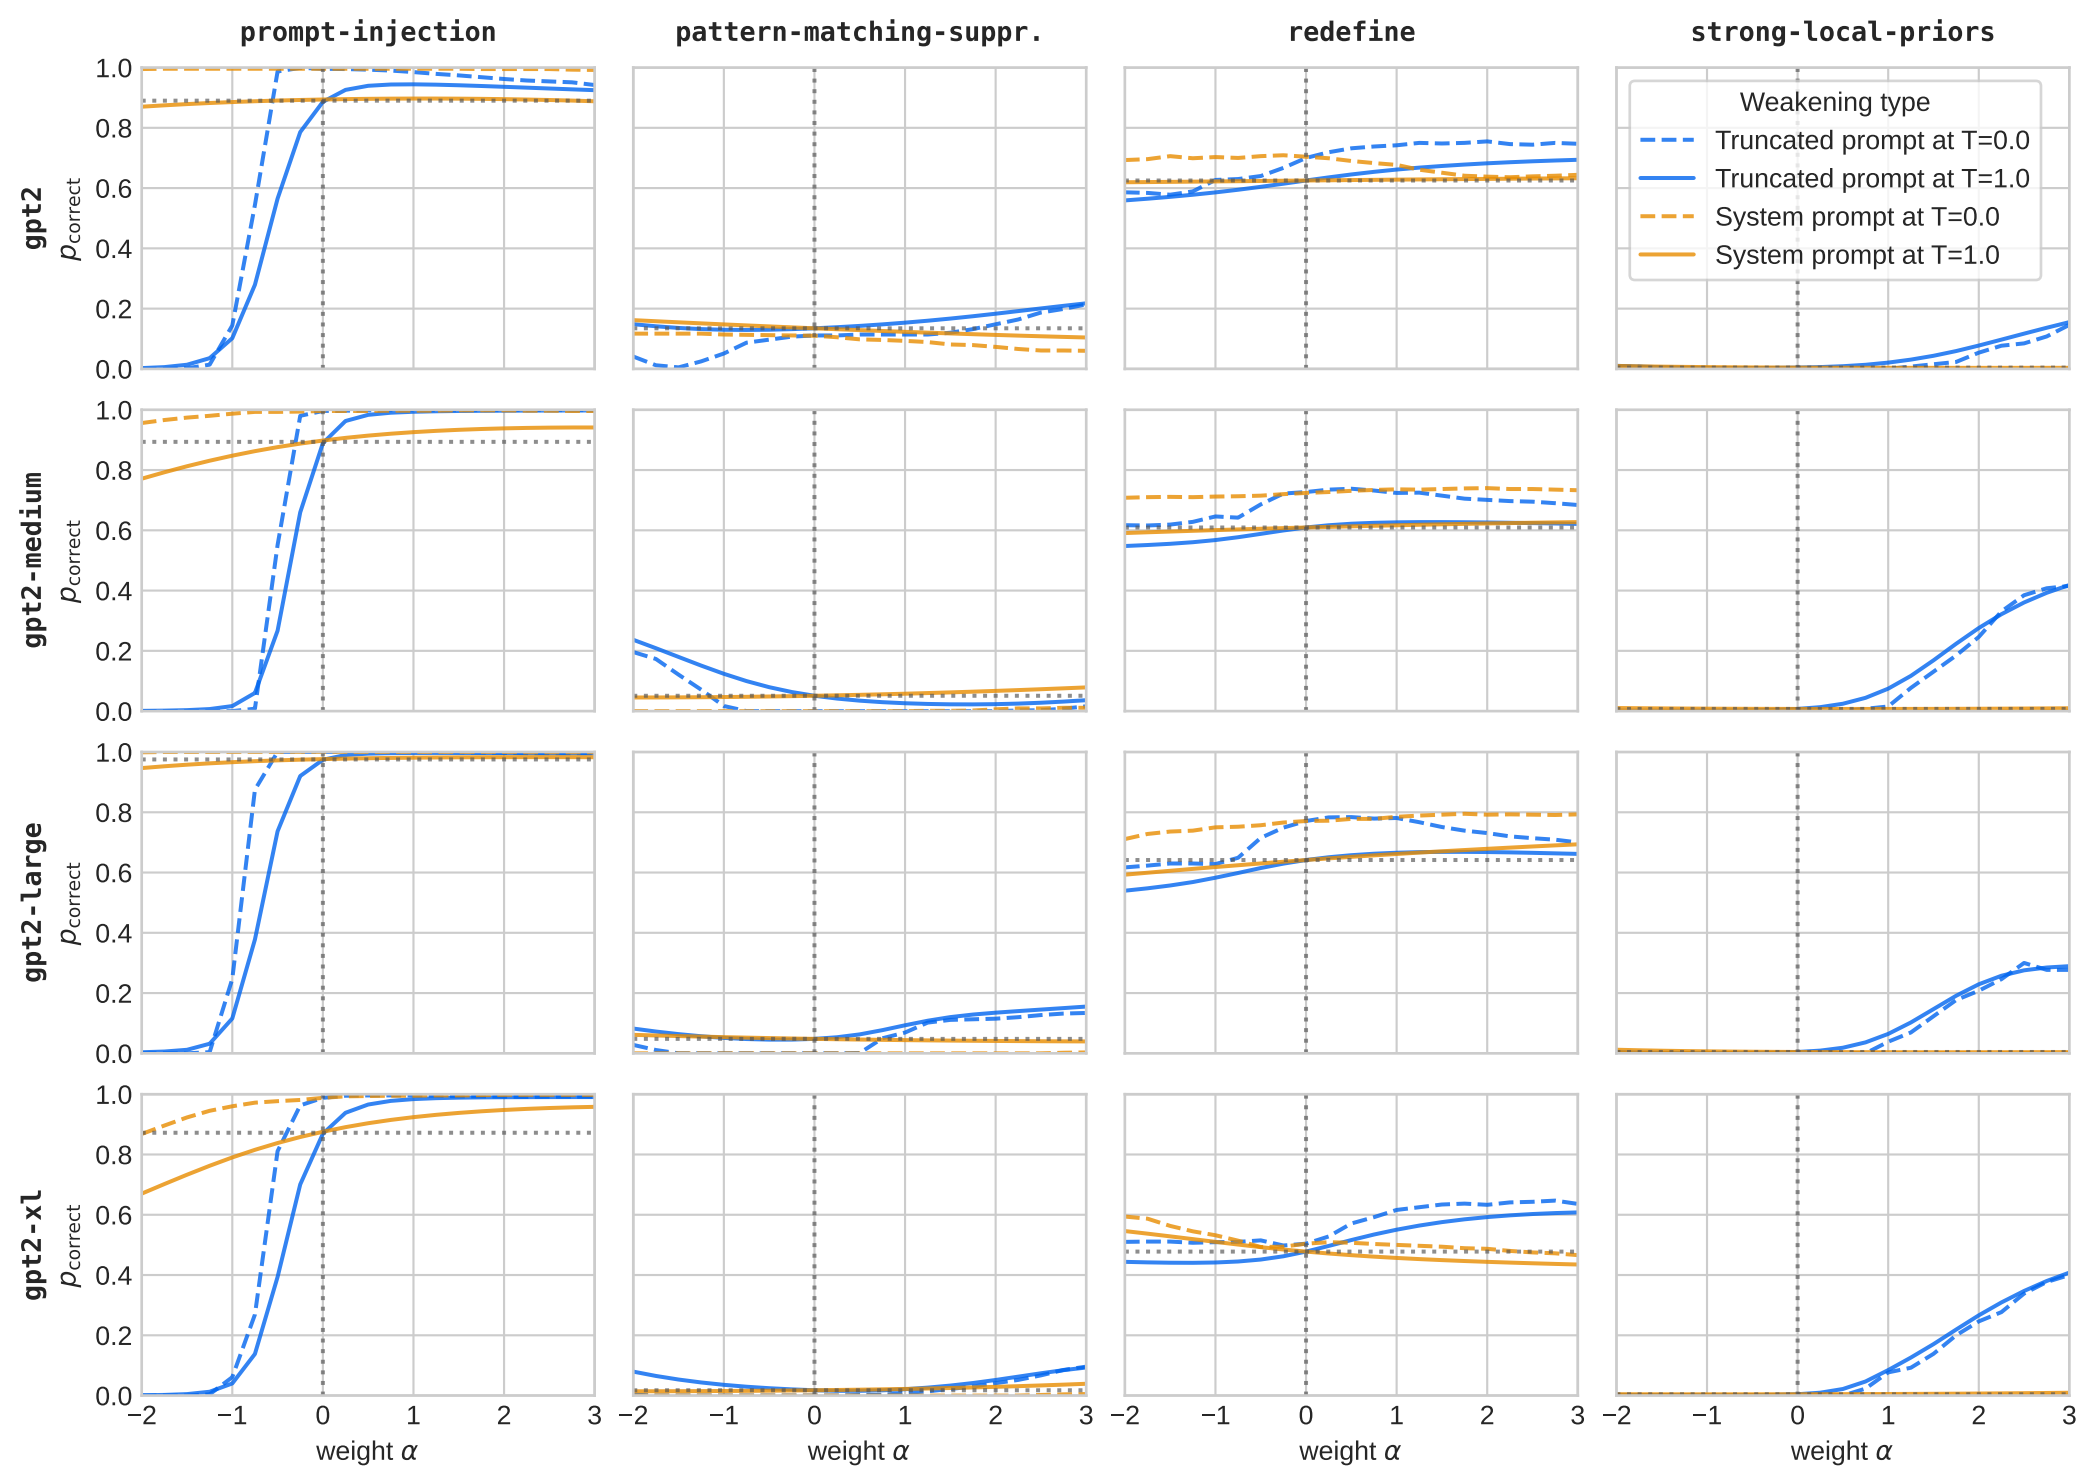

Supplement: supplementary_material [file attachment]

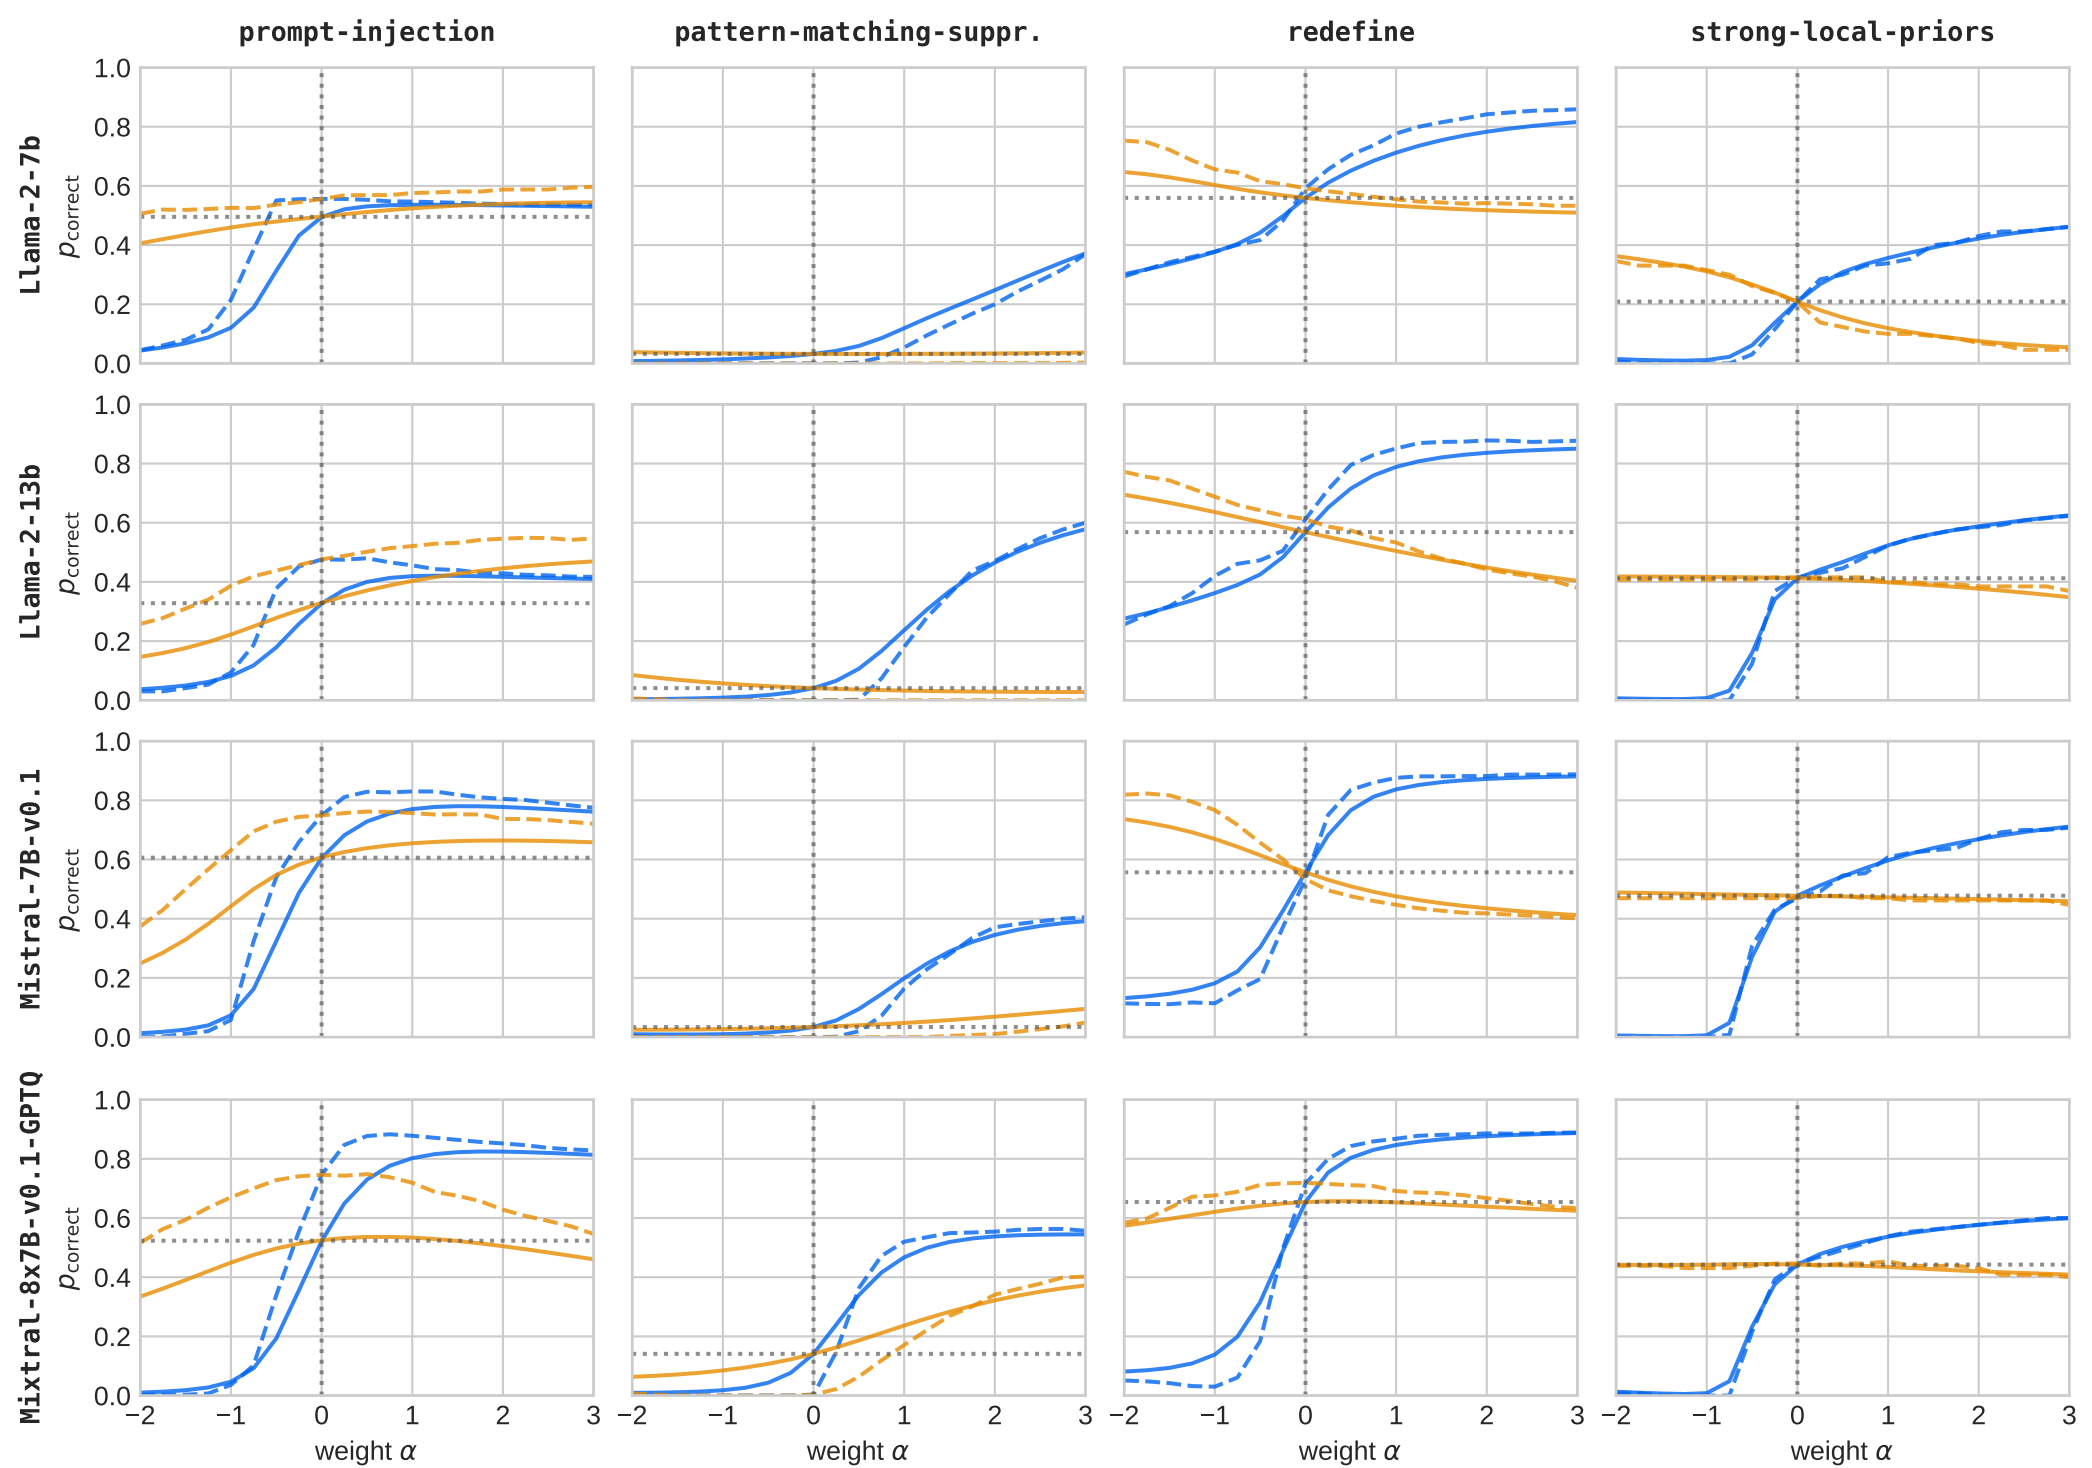

Supplement: supplementary_material [file attachment]

$\alpha = 1.0$ 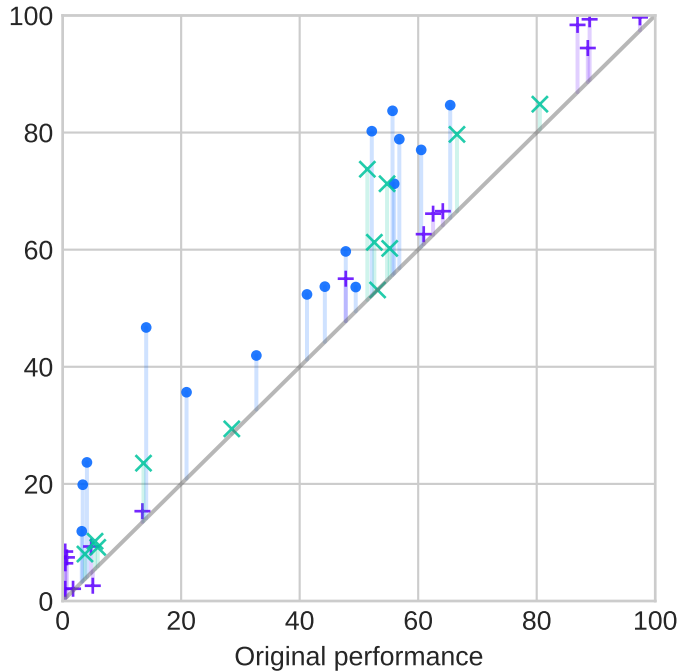 $\alpha = 2.0$ 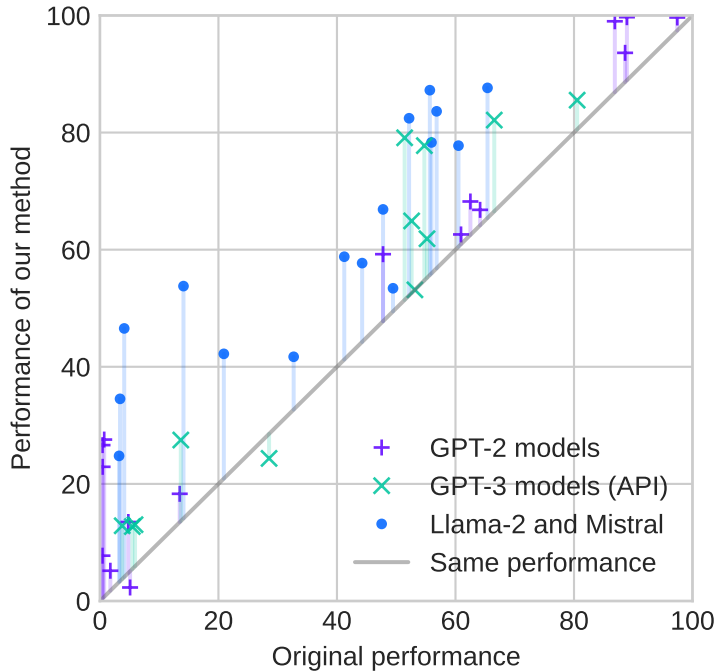

Supplement: supplementary_material [file attachment]

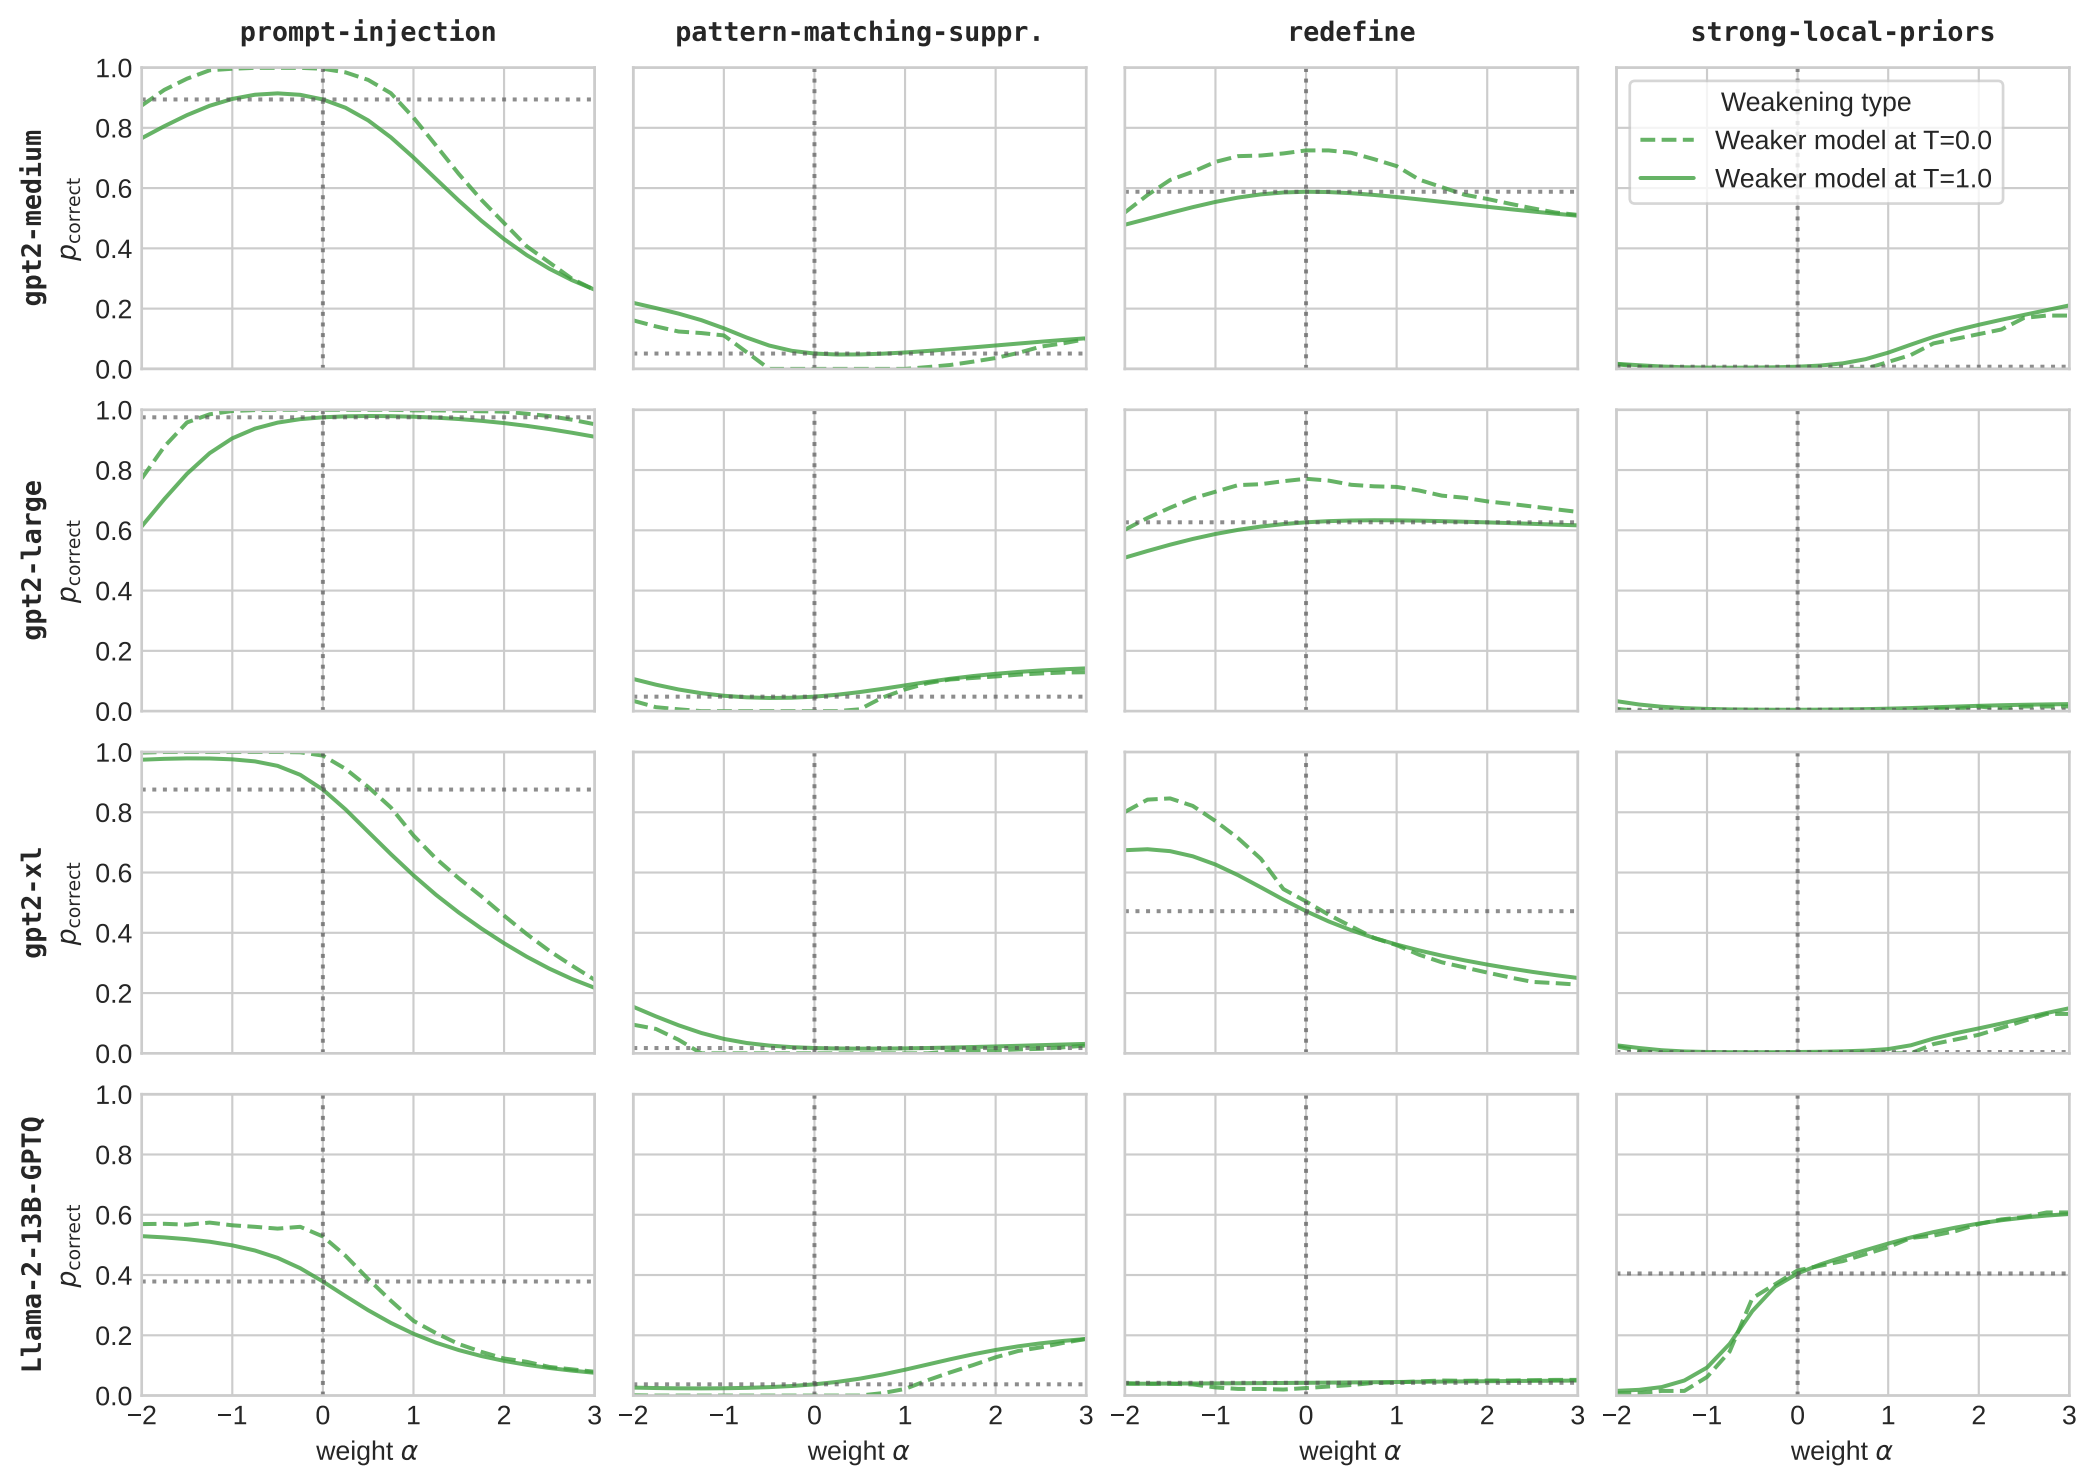

Supplement: supplementary_material [file attachment]
